# Evolving synergetic interactions

Bin Wu<sup>1</sup>, Jordi Arranz<sup>1</sup>, Jinming Du<sup>2</sup>, Da Zhou<sup>3</sup> and Arne Traulsen<sup>1</sup>

<sup>1</sup> Department of Evolutionary Theory, Max Planck Institute for Evolutionary Biology,  
August-Thienemann-Straße 2, 24306 Plön, Germany,

<sup>2</sup> Center for Systems and Control, College of Engineering, Peking University,  
Beijing 100871, China

<sup>3</sup> School of Mathematical Sciences, Xiamen University,  
Xiamen 361005, China

September 10, 2015

## Abstract

The outcome of a major evolutionary transition is the aggregation of independent entities into a new synergetic level of organisation. Classical models involve either pairwise interactions between individuals or a linear superposition of these interactions. However, major evolutionary transitions display synergetic effects: their outcome is not just the sum of its parts. Multiplayer games can display such synergies, as their payoff can be different from the sum of any collection of two-player interactions. Assuming that all interactions start from pairs, how can synergetic multiplayer games emerge from simpler pairwise interaction? Here, we present a mathematical model that captures the transition from pairwise interactions to synergetic multiplayer ones. We assume that different social groups have different breaking rates. We show that non-uniform breaking rates do foster the emergence of synergy, even though individuals always interact in pairs. Our work sheds new light on the mechanisms underlying a major evolutionary transition.

**Keywords:** multiplayer games, synergetic interactions, evolutionary transition

# 1 Introduction

Major evolutionary transitions share cooperation as a common theme: simple units aggregate to form a new level of organisation in which individuals benefit others bearing a cost to themselves (1, 2). However, from a Darwinian perspective, cooperation is difficult to explain, as natural selection promotes selfishness rather than cooperation (3–7). The evolution of cooperation has often been approached through the lens of simple two-player games that depict social dilemmas (8–10). The study of games such as the Prisoner’s Dilemma, or alternative situations such as the Stag-Hunt game (11), have provided insightful views on which mechanisms are likely to promote cooperation — e.g., spatial reciprocity, direct reciprocity, indirect reciprocity, kin selection and group selection (12–14). However, the simplicity of two-player games is a double-edged sword, as these pairwise games may fail to capture the intricacies of complex interactions in real social and biological systems. Evolutionary transitions typically involve multiple interaction partners at the same time rather than a collection of pairwise interactions. For instance, when cells interact to form a multicellular organism, a superposition of pairwise interactions is insufficient to capture the intricacies of the complex organism. This is because an interaction among all the cells is not just a sum of pairwise interactions. Synergetic interactions — the whole being more than the sum of its parts — may be necessary to allow a high level of selection unit to emerge. Synergetic interactions could then pave the way for the emergence of complex phenomena such as division of labour or multicellularity. Therefore, understanding how synergetic interactions emerge is an important part of our understanding of evolutionary transitions.

General multiplayer games, which cannot be decomposed into pairwise interactions, can represent such synergy effects. They can display broader and richer dynamics than their traditional two-player counterparts (15–18). In particular, multiplayer games can exhibit payoff non-linearities and can thus account for the synergetic effects that are intrinsic to major evolutionary transitions. Although the emergence of synergetic interactions among multiple players is key to all major evolutionary transitions as aforementioned (19), we lack fundamental understanding on how such complex synergetic interactions occur in the first place. Here, we present a mathematical model that captures the emergence of synergetic multiplayer games from simple pairwise interactions.

## 2 Results

### 2.1 Model description

We consider a structured population of  $N$  individuals, assorted into  $l$  sets (20), each consisting of  $m$  individuals. Individuals can have a different number of set memberships and play one of two strategies,  $A$  or  $B$ . An individual accumulates the payoff through interactions within all the sets it belongs to. These interactions are always pairwise and the payoff depends on the set configuration, i.e., the number of individuals playing  $A$  and  $B$  in the set. At every time-step, either the strategy of an individual or the set structure is updated. With probability  $w$ , the strategy of an individual is updated. Two individuals are randomly chosen and one imitates the other's strategy with a probability that increases with the payoff difference. Individuals with higher payoffs are more likely to be imitated (21, 22). With probability  $1 - w$ , a set is randomly chosen. This set may break up with probability  $k_i$  — where  $i$  is the number of strategy  $A$  individuals in the set, ranging from 0 to  $m$ . As a consequence,  $k_i$  determines the fragility of a set, which in turn, depends on the set composition (23). If the set breaks, a randomly chosen individual — which belongs to at least one other set — is expelled. In order to keep the size of the set constant, another random individual is then incorporated into the set (Fig.1).

Although our model is simple, it captures two fundamental aspects. First, the set structure mimics the social interactions which is an intrinsic characteristic of biological systems and human societies. For instance, the set size could be based on the diffusion rate of the public goods secreted by cooperative cells (24, 25). The overall structure also allows to consider an organisation of arbitrary size, from a small family to a large assembly. Second, individuals only interact in pairs and payoffs are additive. In this case, the payoff of an individual is nothing but sum of the corresponding pairwise interactions. Thus, there are no imposed synergetic effects via the payoff accumulation process. Instead, it can only emerge from the dynamics of the population structure.

### Pairwise games between two strategies

If the size of the sets is two,  $m = 2$ , the population structure is equivalent to a network, where a “set” becomes a “link” (Fig. 1). In this case, the accumulated payoffs can still be captured by a pairwise interaction, hence there is no synergetic multiplayer interactions (26, 27). Although our analytical framework is general enough to allow the study of any set size, we focus on the

case where  $m = 3$ , that is, when the sets contain three individuals. Let us assume that for two individuals playing strategy  $A$  ( $B$ ), each one obtains a payoff of  $a$  ( $d$ ). Similarly, for two individuals playing different strategies, the individual using strategy  $A$  obtains the payoff  $b$  and the individual using strategy  $B$  obtains the payoff  $c$ . Given that there are three individuals in every set, the payoff of an individual within a set is determined by two pairwise interactions. Therefore, the payoff of an individual playing strategy  $A$  ( $B$ ) in a set with  $j$  other individuals playing  $A$  is given by  $a_j = aj + b(2 - j)$  ( $b_j = cj + d(2 - j)$ ). Note that for  $m = 3$ ,  $j = 0, 1, 2$ . Given that the breaking probability of a specific set may depend on the number of  $A$  individuals within the set, the set dynamics allows for non-uniform breaking probabilities across the sets.

To demonstrate that our simple model can indeed capture the emergence of synergy, we consider two aspects: the accumulated payoff of both types and the evolutionary dynamics of the two strategies. We find that non-uniform breaking probabilities across the sets foster the emergence of synergetic multiplayer interactions. In other words, when the fragilities of the sets are non-uniform we find that (i) the expected accumulated payoff of both strategies is consistent with the one of a typical multiplayer game that cannot be decomposed into a pairwise game, and (ii) the evolutionary dynamics of the strategies exhibit two internal equilibria of selection, which is impossible in a two-player game.

The calculation of the average accumulated payoff in the general case is challenging, even though the model is simple. We overcome this problem by assuming that the probability with which the strategy is updated is small,  $w \ll 1$ . As a consequence, the set structure can reach its stationary state — which determines the accumulated payoffs — before a strategy update occurs. Importantly, the average accumulated payoffs for both strategies are consistent with the payoffs of the following 3-player game in a well mixed population, up to a positive rescaling factor (see SI Appendix, Section 2.1):

| Opposing A players |           |           |           |
|--------------------|-----------|-----------|-----------|
|                    | 0         | 1         | 2         |
| A                  | $a_0/k_1$ | $a_1/k_2$ | $a_2/k_3$ |
| B                  | $b_0/k_0$ | $b_1/k_1$ | $b_2/k_2$ |

(1)

Here  $a_i/k_{i+1}$  is the payoff for an individual using strategy  $A$  when it meets  $i$  opponents using

strategy  $A$ . Equivalently,  $b_i/k_i$  is the payoff for an individual using strategy  $B$  when it meets  $i$  opponents using strategy  $A$ . The payoff table in Eq.(1) has two important features. First, the derived multiplayer game is of the same size as that of the set. Second, the payoff entries are proportional to the product of the accumulated payoff in a set and its lifetime.

The evolutionary outcome of both strategies can be predicted by the replicator equation for a large class of microscopic imitation rules, if the population size is sufficiently large (see SI Appendix, Section 2.2). The replicator equation is given by

$$\dot{x}_A = x_A(1 - x_A)(f_A - f_B), \quad (2)$$

where

$$f_A = \sum_{s=0}^2 \frac{a_s}{k_{s+1}} \binom{2}{s} x_A^s (1 - x_A)^{2-s}, \quad [3]$$

$$f_B = \sum_{s=0}^2 \frac{b_s}{k_s} \binom{2}{s} x_A^s (1 - x_A)^{2-s} \quad [4]$$

are the payoffs for strategy  $A$  and  $B$  of the 3-player game based on Eq. (1), and  $x_A$  is the fraction of individuals using strategy  $A$ . In other words, the dynamics of the pairwise game under active set dynamics can be captured by a multiplayer game in a well-mixed population. The internal equilibria of this equation are the roots of the equation  $f_A - f_B = 0$ . Based on the initial fraction of individuals using strategy  $A$ , these equilibria determine where an infinite population would end up (28).

The above results on the accumulated payoffs and the evolutionary dynamics of strategies hold for any set fragilities  $(k_0, k_1, k_2, k_3)$ . In the following, we apply these results to homogenous and heterogeneous set fragilities to address when and how synergetic interactions emerge.

Whenever the fragility of the sets is homogenous,  $k_0 = k_1 = k_2 = k_3$ , Eq. (1) is identical to the one of the original pairwise game, even though it is a 3-player game (see SI Appendix, Section 2.2). Therefore there is no synergy effect in the payoffs. Given that the replicator equation is equivalent to the one of the pairwise game, there is at most one internal equilibrium with the same position and stability. The upper panel of Fig. 2 shows the agreement between the analytical approximation and a simulation of the full model.

However, when fragilities are not homogeneous across the sets, Eq.(1) becomes a 3-player game, which cannot be decomposed into additive pairwise interactions (lower panel of Fig. 2).

In this case, the payoff of an individual interacting with two opponents is not equal to the sum of the two pairwise interactions (Fig. 3). Consequently, the presence of non-uniform set breaking probabilities generates synergetic payoffs. Synergy emerges exclusively as a result of the evolutionary dynamics of the set structured population. In addition to this, the replicator equation has two internal equilibria, which is not possible in pairwise interactions (see lower panel of Fig. 2). Static random networks display similar effects (29). A necessary condition for the emergence of two equilibria is that the sign of the effective payoff difference  $a_i/k_{i+1} - b_i/k_i$  changes twice with the increase of the number of opponents using strategy  $A$ ,  $i$  (30, 31). A more detailed analysis on the conditions that lead to two internal equilibria can be found in SI Appendix, Section 2.2. If one of the two equilibria is stable, the other has to be unstable. Given this, our model can explain both the maintenance of biodiversity and phenotypic dominance within the same framework.

### Pairwise games between $n$ strategies

The model can be extended to account for an arbitrary number of strategies,  $n$ , instead of only two. In the pairwise interactions with  $n$  strategies or an  $n \times n$  game, the non-uniform breaking probabilities also generate synergetic multiplayer interactions. Although the analytical calculations are more intricate due to the increased number of set configurations, we find that the payoff matrix of the emergent multiplayer game is consistent with the one of an  $n$ -strategy  $m$ -player game (SI Appendix, Section 3.1). Interestingly, the intuition behind these payoff entries is similar to the ones of the two-strategy case, as they still represent the product of the additive payoffs via pairwise interactions and the duration of that set. In addition to this, the  $n$ -strategy  $m$ -player game has, at most,  $(m-1)^{n-1}$  isolated internal equilibria, whereas the original  $n \times n$  pairwise game has at most one equilibrium (SI Appendix, Section 3.2). The dynamics in our model are thus rich enough to capture complex phenomena exhibited by social and biological systems.

## 3 Discussion

Synergy refers to the idea that the whole is greater than the sum of its parts. Interestingly, synergy is identical to “cooperation” in ancient Greek. Synergy can be observed in a plethora of different contexts such as in genes (32), microbial populations (33), and even social and economic systems. From an evolutionary perspective, synergy is a cornerstone of all major evolutionary tran-

sitions. These evolutionary milestones involve the aggregation of simple units into a new entity which becomes a higher-level Darwinian unit of selection (1). With this in mind, we present a minimalistic model that shows how synergy can actually emerge. Our model allows to treat the emergence of synergetic interactions from simple additive pairwise ones analytically. We assume that the strategy of the individuals and the set structure evolve in time. The results prove that non-uniform set breaking rates, which depend exclusively on the configuration of these sets, lead to payoff non-linearities. These are consistent with the dynamics of a multiplayer game, even though individuals always play a two-player game and no group selection effects are present. These findings rely on two conditions: i) sets must contain more than two individuals, and ii) the breaking rates must depend on the configuration of the sets and, hence be non-uniform. As a consequence, our model may be useful as a starting point for the investigation of the evolution of more complex phenomena, e.g., synergetic interactions within the group. It shows how the aggregation of individuals can lead to complex interactions that cannot be disentangled into simpler interactions.

## Methods

*The Fermi updating rule.* We use the Fermi update rule, given by the following algorithm:

- (i) Randomly select an individual,  $a^*$  and denote its payoff as  $\pi_{a^*}$ ;
- (ii) Randomly select another individual,  $b^*$ , among all the individuals in the sets individual  $a^*$  is in and denote the payoff of  $b^*$  as  $\pi_{b^*}$ ;
- (iii)  $a^*$  switches to the strategy of  $b^*$  with probability  $(1 + \exp[-\beta(\pi_{b^*} - \pi_{a^*})])^{-1}$ .

*Accumulated payoffs.* Each data point is the average of 100 independent realisations. Every realisation takes  $10^6$  generations. In each realisation, for the first  $10^4$  generations, only set dynamics occur. For the rest generations, at every step, with probability  $w = 10^{-3}$  we compute the average accumulated payoff of each strategy. Otherwise, with probability  $1 - w$ , set dynamics happens. At the end of each realisation, we compute the mean value of all the average accumulated payoff.

*Selection gradient.* Each data point is the average of 100 independent realisations. Every realisation takes  $10^7$  generation. For the first  $10^4$  generations of each realisation, only set dynamics occur. After that, with a probability of  $w = 10^{-3}$  two individuals are chosen randomly from the entire population. The first individual is the “focal” one which is the one that may imitate the strategy

181 of the second one based on the Fermi rule. We keep track of the transition without implementing  
182 them. We denote  $y$  and  $z$  as the number of times that an individual playing strategy  $A$  and  $B$   
183 changes its strategy.  $\frac{z-y}{Q}$  is the estimator of the selection gradient  $\dot{x}_A$ , where  $Q$  is the number of  
184 strategy updating events in this realisation.

185 *Accumulated group payoffs.* Each data point is the average of 100 independent realisations.  
186 Every realisation takes  $10^6$  generations. In each realisation, for the first  $10^4$  generations, only set  
187 dynamics occur. For the rest generations, at every step, with probability  $w = 10^{-3}$  we compute  
188 the average accumulated payoff of each strategy induced by the set with 0, 1 and 2 strategy A  
189 opponents, respectively. Otherwise, with probability  $1 - w$ , set dynamics happens. At the end of  
190 each realisation, we compute the mean value of all the average accumulated payoff.

## 191 Acknowledgements

192 We thank Chaitanya Gokhale for inspiring discussions.

## 193 References

- 194 [1] Maynard Smith, J. and Szathmáry, E. *The major transitions in evolution*. W. H. Freeman,  
195 Oxford, (1995).
- 196 [2] Michod, R. E. Cooperation and conflict in the evolution of individuality. i. multilevel selection  
197 of the organism. *The American Naturalist* **149**, 607–645 (1997).
- 198 [3] Darwin, C. *On the origin of species by means of natural selection*. Cambridge-London.  
199 Reprinted in Harvard University Press (1964), (1859).
- 200 [4] Bonner, J. The origins of multicellularity. *Integrative Biology* **1**, 27–36 (1998).
- 201 [5] Wolpert, L. and Szathmáry, E. Multicellularity: evolution and the egg. *Nature* **420**(6917),  
202 745–745 (2002).
- 203 [6] Ratcliff, W. C., Denison, R. F., Borrello, M., and Travisano, M. Experimental evolution of  
204 multicellularity. *Proceedings of the National Academy of Sciences USA*, 1–6 Jan (2012).
- 205 [7] Ratcliff, W. C., Fankhauser, J. D., Rogers, D. W., Greig, D., and Travisano, M. Origins of  
206 multicellular evolvability in snowflake yeast. *Nature Communications* **6**, 6102 (2015).



- 207 [8] Maynard Smith, J. *Evolution and the Theory of Games*. Cambridge University Press, Cam-  
208 bridge, (1982).
- 209 [9] Taylor, C. and Nowak, M. A. Transforming the dilemma. *Evolution* **61**, 2281–2292 (2007).
- 210 [10] Broom, M. and Rychtář, J. *Game-Theoretical Models in Biology*. Chapman and Hall/CRC,  
211 (2013).
- 212 [11] Skyrms, B. *The Stag-Hunt Game and the Evolution of Social Structure*. Cambridge Univer-  
213 sity Press, Cambridge, (2003).
- 214 [12] Nowak, M. A. Five rules for the evolution of cooperation. *Science* **314**, 1560–1563 (2006).
- 215 [13] Fletcher, J. A. and Doebeli, M. A simple and general explanation for the evolution of altruism.  
216 *Proceedings of the Royal Society B* **276**, 13–19 (2009).
- 217 [14] Nowak, M. A., Tarnita, C. E., and Antal, T. Evolutionary dynamics in structured populations.  
218 *Philosophical Transactions of the Royal Society B* **365**, 19–30 (2010).
- 219 [15] Hauert, C., Michor, F., Nowak, M. A., and Doebeli, M. Synergy and discounting of coopera-  
220 tion in social dilemmas. *Journal of Theoretical Biology* **239**, 195–202 (2006).
- 221 [16] Pacheco, J. M., Santos, F. C., Souza, M. O., and Skyrms, B. Evolutionary dynamics of  
222 collective action in n-person stag hunt dilemmas. *Proceedings of the Royal Society B* **276**,  
223 315–321 (2009).
- 224 [17] Kurokawa, S. and Ihara, Y. Emergence of cooperation in public goods games. *Proceedings*  
225 *of the Royal Society B* **276**, 1379–1384 (2009).
- 226 [18] Gokhale, C. S. and Traulsen, A. Evolutionary games in the multiverse. *Proceedings of the*  
227 *National Academy of Sciences USA* **107**, 5500–5504 (2010).
- 228 [19] Tarnita, C. E., Taubes, C. H., and Nowak, M. A. Evolutionary construction by staying together  
229 and coming together. *Journal of Theoretical Biology* **320**(0), 10–22 (2013).
- 230 [20] Tarnita, C. E., Antal, T., Ohtsuki, H., and Nowak, M. A. Evolutionary dynamics in set struc-  
231 tured populations. *Proceedings of the National Academy of Sciences USA* **106**, 8601–8604  
232 (2009).

- 233 [21] Blume, A. Communication, risk, and efficiency in games. *Games and Economic Behavior*  
234 **22**, 171–202 (1998).
- 235 [22] Szabó, G. and Fáth, G. Evolutionary games on graphs. *Physics Reports* **446**, 97–216  
236 (2007).
- 237 [23] Simon, B., Fletcher, J. A., and Doebeli, M. Towards a general theory of group selection.  
238 *Evolution* **67**(6), 1561–1572 (2013).
- 239 [24] Gore, J., Youk, H., and van Oudenaarden, A. Snowdrift game dynamics and facultative  
240 cheating in yeast. *Nature* **459**, 253–256 (2009).
- 241 [25] Xavier, J. B. Social interaction in synthetic and natural microbial communities. *Molecular*  
242 *Systems Biology* **7**, 483 (2011).
- 243 [26] Wu, B., Zhou, F., Luo, Q., Wang, L., and Traulsen, A. Evolution of cooperation on stochastic  
244 dynamical networks. *PLoS One* **5**, e11187 (2010).
- 245 [27] Pacheco, J. M., Traulsen, A., and Nowak, M. A. Coevolution of strategy and structure in  
246 complex networks with dynamical linking. *Physical Review Letters* **97**, 258103 (2006).
- 247 [28] Hofbauer, J. and Sigmund, K. *Evolutionary Games and Population Dynamics*. Cambridge  
248 University Press, Cambridge, UK, (1998).
- 249 [29] Pinheiro, F. L., Santos, F. C., and Pacheco, J. M. How selection pressure changes the nature  
250 of social dilemmas in structured populations. *New Journal of Physics* **14**, 073035 (2012).
- 251 [30] Farouki, R. T. The bernstein polynomial basis: A centennial retrospective. *Computer Aided*  
252 *Geometric Design* **29**, 379–419 (2012).
- 253 [31] Peña, J., Lehmann, L., and Nöldeke, G. Gains from switching and evolutionary stability in  
254 multi-player matrix games. *Journal of Theoretical Biology* **346**, 23–33 (2014).
- 255 [32] Sanjuán, R. and Elena, S. F. Epistasis correlates to genomic complexity. *Proc Natl Acad Sci*  
256 *U S A* **103**(99), 14402–14405 (2006).
- 257 [33] Chelo, I. M., Nédli, J., Gordo, I., and Teotónio, H. An experimental test on the probability of  
258 extinction of new genetic variants. *Nat Commun* **4**(2417) 09 (2013).

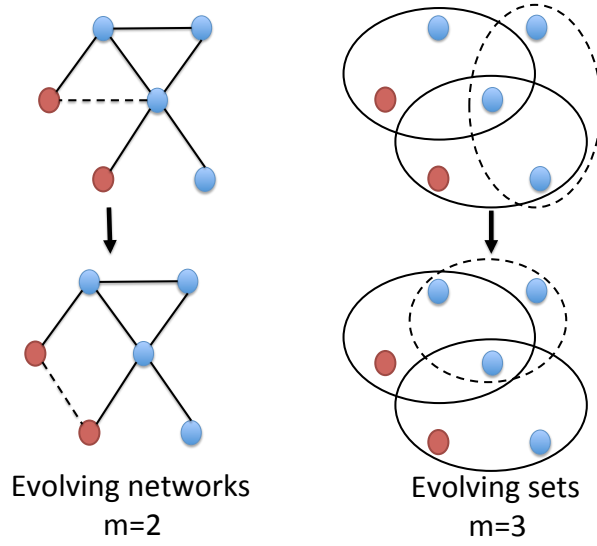

Figure 1: Set dynamics for sets of size  $m = 2$  (left column) and  $m = 3$  (right column). Blue and red dots represent strategies  $A$  and  $B$  respectively. When  $m = 2$  (left column) “sets” are actually “links” and the overall structure is a network (26). In this case, interactions are strictly pairwise, hence there is no synergetic effect in the payoffs. The right column shows the case with  $m = 3$ , which is the minimum set size that illustrates the emergence of synergetic interactions. With probability  $1 - w$  a set is selected at random (dashed lines). This set breaks up with probability  $k_i$ , where  $i$  is the number of strategy  $A$  individuals in the set. If the set breaks, a randomly chosen individual is expelled. In order to keep the size of the set constant, another random individual is incorporated into the updated set (dashed lines).

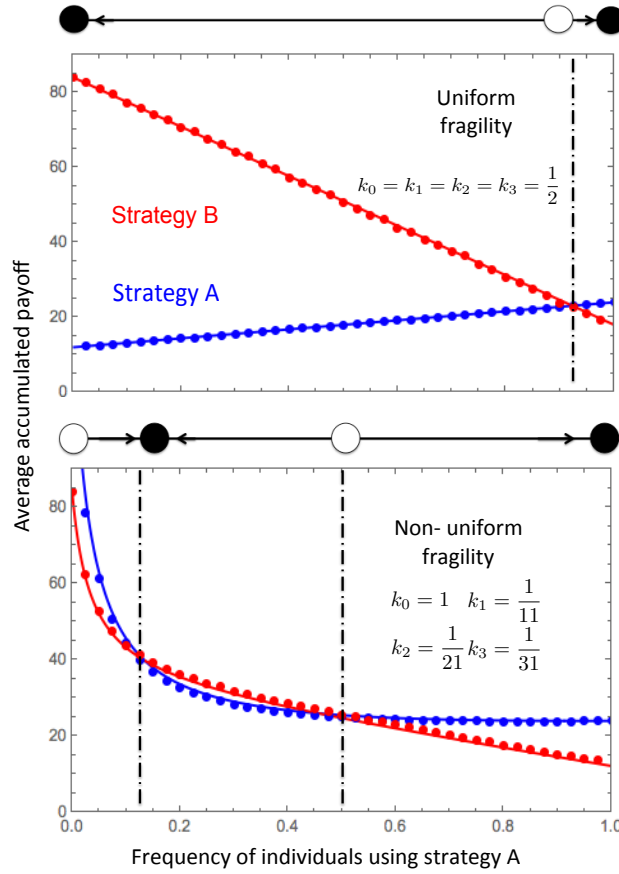

Figure 2: Accumulated payoffs for the Stag-Hunt game and the equilibria of the selection gradient for two fragility scenarios. The full/empty circles on top of each of the two panels show the analytical approximation for the stable/unstable equilibria of the replicator dynamics. Top: For uniform breaking rates, the accumulated payoffs for both strategies match the ones of a pairwise game. Thus, the payoffs change linearly with the fraction of  $A$  individuals and the replicator equation predicts just the single internal equilibrium of the pairwise game. Bottom: When the breaking rates depends on the set configuration, the payoffs for both strategies become non-linear. The more  $A$  individuals a set has, the less likely it breaks up. The payoffs for both strategies have two interSections, which lead to two internal equilibria. This illustrates that non-uniform interactions can lead to the emergence of synergetic interactions. There is a perfect agreement between simulations (dots) and analytical approximation (lines). (Parameters: Stag-Hunt game with  $a = 2$ ,  $b = 1$ ,  $c = 1.5$  and  $d = 7$ . Population size,  $N = 500$ , number of sets,  $l = 1000$ , probability of a strategy update,  $w = 10^{-3}$ . Selection intensity,  $\beta = 0.1$ . See Methods for the simulation details).

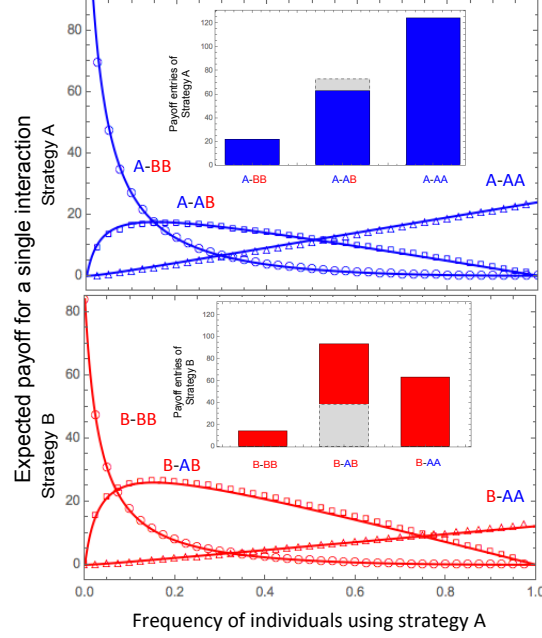

Figure 3: Expected payoffs for individuals using strategies  $A$  (upper panel) and  $B$  (lower panel) in groups of different compositions. The two insets within each plot show the effective payoff entries of the emergent 3-player game Eq. (1) for a frequency of 0.5. Main panels: Theoretical predictions for the payoff within the three set configurations of each individual, Eqs. (3) and (4) (lines) agree well the accumulated payoff obtained by simulation (symbols). This in turn proves that the synergetic 3-player game is intrinsically captured by Eqs. (3) and (4) even term by term. Upper inset: Payoffs for equal abundance of both strategies. An individual with strategy  $A$  gains less if it interacts in a set which has 1 individual with strategy  $A$  than it were in the synergy free case (grey, dashed). Lower inset: An individual with strategy  $B$  gains much more if it interacts in a set which has 1 individual with strategy  $A$  than it were in the synergy free case (grey, dashed). Here the payoffs in the synergy free cases are the average values of the two payoff entries for the focal individual interacting with 0 and 2  $A$  individuals. Thus, the interaction can no longer be decomposed into multiple pairwise interactions, which is how every individual obtains its payoff microscopically. (Parameters are the same as that in the lower panel of Fig. 2. The inner panels are obtained by simulation via setting the frequency of individuals using strategy  $A$  to be one half. See Methods for the simulation details.)

# Supplementary Information of “Evolving synergetic interactions”

Bin Wu<sup>1</sup>, Jordi Arranz<sup>1</sup>, Jinming Du<sup>2</sup>, Da Zhou<sup>3</sup> and Arne Traulsen<sup>1</sup>

<sup>1</sup> Department of Evolutionary Theory, Max Planck Institute for Evolutionary Biology,  
August-Thienemann-Straße 2, 24306 Plön, Germany,

<sup>2</sup> Center for Systems and Control, College of Engineering, Peking University,  
Beijing 100871, China

<sup>3</sup> School of Mathematical Sciences, Xiamen University,  
Xiamen 361005, China

September 10, 2015

## 1 Contents

|   |                                                               |          |
|---|---------------------------------------------------------------|----------|
| 2 | <b>1 Evolutionary dynamics in a set structured population</b> | <b>2</b> |
| 3 | <b>2 Games with two strategies</b>                            | <b>3</b> |
| 4 | 2.1 Accumulated payoffs . . . . .                             | 3        |
| 5 | 2.2 Evolutionary dynamics of strategies . . . . .             | 6        |
| 6 | <b>3 Games with <math>n</math> strategies</b>                 | <b>8</b> |
| 7 | 3.1 Accumulated payoffs . . . . .                             | 8        |
| 8 | 3.2 Evolutionary dynamics of strategies . . . . .             | 12       |

# 1 Evolutionary dynamics in a set structured population

Consider a set structured population of fixed size  $N$  where individuals engage in a pairwise game. The population is divided into a constant number of sets,  $l$ , each of them of constant size  $m$ . Individuals can belong to different sets.

At each time step, we either update the strategy of an individual — with probability  $w$  — or the structure of the population, with probability  $1 - w$ .

A strategy update involves two randomly selected individuals, say Alice and Bob. Alice imitates Bob's strategy with a probability depending on the difference of their payoffs, i.e., the imitation rule (1). The payoff of an individual is calculated as the sum of all the pairwise interactions through all the sets it belongs to. For instance, if Alice belongs to two sets, her payoff is the sum of the payoff in the first set, plus the payoff in the second one. Given that every set consists of  $m$  individuals, the payoff of an individual in a set is the sum of  $m - 1$  pairwise interactions. On the other hand, when set dynamics occur, a set is randomly selected. This set may break with a probability which depends on the set composition. In particular, if there are only two strategies, the set composition is the number of individuals within the set playing a specific strategy. If the set is broken, a random individual within the set is expelled, provided it is in at least one other set. In order to keep the size of the set constant, another random individual is added to the focal set.

We start with the simplest pairwise games with two strategies,  $A$  and  $B$ . The  $2 \times 2$  payoff matrix is given by  $(a_{ij})_{2 \times 2}$ , where  $a_{ij}$  is the payoff of an individual playing strategy  $i$  with an opponent playing strategy  $j$ , where  $i, j \in \{A, B\}$ . We find that the average accumulated payoff for each strategy is consistent with the one of a 2-strategy,  $m$ -player game up to a positive rescaling factor. When the breaking probability of a set is uniform across all kinds of sets, the payoff of the  $m$ -player game is equivalent to that of a sum of  $m - 1$  pairwise games. However, we notice that whenever the sets have different breaking probabilities that depend on the set composition, intrinsic multiplayer interactions emerge. In this case, the accumulated payoff of both strategies cannot be decomposed into collections of pairwise games anymore. In other words, synergetic effects in payoff can emerge from simple pairwise interactions. Based on accumulated payoffs, we further obtain the replicator equation of the  $m$ -player game to determine the evolutionary fate of each strategy. In addition to this, the replicator equation shows up to  $m - 1$  internal equilibria. In contrast, for pairwise interaction there is at most one such equilibrium. These results are obtained under the assumption of fast set dynamics — very few strategy updates occurs before

40 the population structure has reached the stationary state — and a large population size.

41 We generalise the above results for cases where the number of strategies,  $n$ , is greater than  
 42 two. In this case the payoff matrix is given by  $(a_{ij})_{n \times n}$ , where  $i, j \in \{1, 2, \dots, n\}$ . In this technically  
 43 somewhat more challenging case, we find similar results:

44 (i) The average accumulated payoff of each strategy is of the form of an  $n$ -strategy,  $m$ -player  
 45 game up to a positive rescaling factor.

46 (ii) When the set breaking probabilities are uniform, the payoff of the  $n$ -strategy  $m$ -player game  
 47 is still consistent with the sum of the  $m - 1$  pairwise games.

48 (iii) Non-uniform set breaking probabilities foster the emergence of multiplayer interactions,  
 49 which cannot be decomposed into a collection of pairwise games.

50 (iv) The replicator equation of the  $n$ -strategy  $m$ -player captures evolutionary dynamics of the  
 51 strategies and displays, at most,  $(n - 1)^{m-1}$  internal equilibria, whereas pairwise  $n \times n$   
 52 games display, at most, a single equilibrium (2).

## 53 2 Games with two strategies

### 54 2.1 Accumulated payoffs

55 Initially, i.e. at time  $t = 0$ , we call the  $l$  sets  $T_i^0$ ,  $1 \leq i \leq l$ . For the first time step in the set evolution,  
 56  $t = 1$ , we denote the selected set as  $T_{i^*}^0$ . If this set is broken and transforms to another set, we  
 57 denote the transformed set as  $T_{i^*}^1$ , otherwise the set is not broken and we let  $T_{i^*}^1 = T_{i^*}^0$ . For the  
 58 other sets which are not selected, we denote  $T_i^1 = T_i^0$ ,  $i \neq i^*$ . Recursively, we define  $T_i^t$  for  $t \geq 0$   
 59 and  $1 \leq i \leq l$ .

60 Let  $\psi(T_i^t)$  be the number of strategy  $A$  individuals in set  $T_i^t$ , thus  $0 \leq \psi(T_i^t) \leq m$ . For each set  
 61  $i$ , the dynamics of  $\psi(T_i^t)$  is a Markov chain in state space  $\{0, 1, 2 \dots m\}$  with the transition matrix

$$Q = \frac{1}{l}V + \frac{l-1}{l}I_{m+1}, \quad [1]$$

62 where  $I_{m+1}$  is the identity matrix of size  $m+1$  and  $V$  is the transition matrix when set  $i$  is selected.



Hence,  $V = (V_{ij})_{(m+1) \times (m+1)}$  ( $0 \leq i, j \leq m$ ) is a tridiagonal matrix given by

$$V_{ij} = \begin{cases} k_i \frac{m-i}{m} x_A & \text{if } j = i + 1 \\ 1 - k_i \left( \frac{m-i}{m} x_A + \frac{i}{m} x_B \right) & \text{if } j = i \\ k_i \frac{i}{m} x_B & \text{if } j = i - 1 \\ 0 & \text{otherwise} \end{cases}. \quad [2]$$

Here  $x_A$  and  $x_B = 1 - x_A$  are the fractions of strategy  $A$  and  $B$  in the population,  $k_i$  is the breaking probability of a set consisting of  $i$  individuals playing strategy  $A$  and  $m - i$  individuals playing strategy  $B$ .

When  $x_A > 0$  and  $x_B > 0$ , the matrix  $Q$  is irreducible and aperiodic and there is a unique stationary distribution  $y = (y_0, y_1, \dots, y_m)$  of  $Q$  determined by  $yQ = y$ . Taking Eq. (1) into  $yQ = y$  leads to  $yV = y$ . This leads to the stationary distribution

$$y_s = \frac{1}{\mathcal{N} k_s} \binom{m}{s} x_A^s x_B^{m-s}, \quad 0 \leq s \leq m, \quad [3]$$

where  $\mathcal{N} = \sum_{s=0}^m \binom{m}{s} \frac{1}{k_s} x_A^s x_B^{m-s} > 0$  is a normalisation factor. The stationary distribution also represents the proportion of each type of set among all the sets in the stationary regime.

When set dynamics are fast, the imitation event happens rarely enough to allow the population structure to reach the stationary state before a single imitation event occurs. In this case, the stationary regime of the set dynamics determines the average payoff of both strategies. Here the accumulated payoff of strategy  $A$  is given by

$$\begin{aligned} f_A &= \frac{\text{Total payoff of all the strategy } A \text{ individuals}}{\text{Number of strategy } A \text{ individuals}} \\ &= \frac{\sum_{j=1}^m l y_j j (a_{AA}(j-1) + a_{AB}(m-j))}{\mathcal{N} x_A} \\ &= \frac{1}{\mathcal{N}} \frac{l}{N} \sum_{j=1}^m \binom{m}{j} j \frac{1}{k_j} x_A^{j-1} x_B^{m-j} \underbrace{(a_{AA}(j-1) + a_{AB}(m-j))}_{a_{j-1}}. \end{aligned} \quad [4]$$

As  $j \binom{m}{j} = m \binom{m-1}{j-1}$ , Eq. (4) can be written as

$$\frac{1}{\mathcal{N}} \frac{lm}{N} \sum_{j=1}^m \binom{m-1}{j-1} x_A^{j-1} x_B^{m-j} \frac{a_{j-1}}{k_j}. \quad [5]$$

77 With  $s = j - 1$ , Eq (5) becomes

$$f_A = \frac{1}{\mathcal{N}} \frac{lm}{N} \underbrace{\sum_{s=0}^{m-1} \binom{m-1}{s} x_A^s x_B^{m-1-s} \frac{a_s}{k_{s+1}}}_{\tilde{f}_A}. \quad [6]$$

78 Similarly, we have

$$f_B = \frac{1}{\mathcal{N}} \frac{lm}{N} \underbrace{\sum_{s=0}^{m-1} \binom{m-1}{s} x_A^s x_B^{m-1-s} \frac{b_s}{k_s}}_{\tilde{f}_B}, \quad [7]$$

79 where  $b_s = a_{BA}s + a_{BB}(m-1-s)$  is the accumulated payoff of an individual using strategy  $B$   
80 gets in a set consisting of  $s$  individuals using strategy  $A$ .

81 Besides the common positive rescaling factor  $\frac{1}{\mathcal{N}} \frac{lm}{N}$ , the average accumulated payoffs for both  
82 strategies are  $\tilde{f}_1$  and  $\tilde{f}_2$ . Interestingly  $\tilde{f}_A$  and  $\tilde{f}_B$  are exactly the payoff of an  $m$ -player game in a  
83 well-mixed population,

---

---

|                             |           |     |               |     |                   |
|-----------------------------|-----------|-----|---------------|-----|-------------------|
| Opposing strategy A players | 0         | ... | $s$           | ... | $m-1$             |
| Strategy A                  | $a_0/k_1$ | ... | $a_s/k_{s+1}$ | ... | $a_{m-1}/k_m$     |
| Strategy B                  | $b_0/k_0$ | ... | $b_s/k_s$     | ... | $b_{m-1}/k_{m-1}$ |

---

---

. [8]

84 Here  $a_s/k_{s+1}$  ( $b_s/k_s$ ) is the payoff of an individual using strategy  $A$  ( $B$ ) obtains when it meets  
85  $s$  strategy  $A$  opponents. This payoff table has two remarkable features: First, the number of  
86 players in the multiplayer game and the set size are equal. Second, the payoff entries of the  
87 multiplayer game are the product of the linear collective payoff via pairwise interactions in a set  
88 and the duration of the corresponding set. Taking  $a_0/k_1$  as an example,  $a_0/k_1$  is the payoff of an  
89 individual playing strategy  $A$  when he interacts with 0 strategy  $A$  opponents, or  $m-1$  strategy  
90  $B$  individuals. However, within a set, the accumulated payoff of an individual playing strategy  $A$   
91 is given by  $a_0 = (m-1)a_{12}$  and results from the  $m-1$  pairwise interactions in the set where  
92  $1/k_1$  is the duration of the set. In other words,  $a_0/k_1$  is the accumulated payoff rescaled with the  
93 interaction time.

When  $m = 2$ , the population structure is equivalent to a network and the sets represent links. In this case, the effective payoff table in Eq. (8) is still a pairwise game. This transformation can alter the effective payoff of both strategies, however it cannot lead to synergetic effect in payoffs as there is only one pairwise interaction in the transformed table. When  $m = 3$ , the emergent payoff table is consistent with a 3-player game. On one hand, we can take the payoff entries as the synergetic payoff of two individuals. On the other hand, we have the additive payoffs via the two pairwise interactions in that set. A comparison between these two payoffs can facilitate us to study when “the whole is better than the sum of its parts”, i.e., the synergetic payoff is better off than that derived by two pairwise interactions.

When the set breaking probabilities are uniform — i.e.,  $k_i$  is constant —, we find — by Eq. (6) and Eq. (7) — that the accumulated payoffs for strategy  $A$  and  $B$  are  $f_A = (m-1)(a_{11}x_A + a_{12}x_B)$  and  $f_B = (m-1)(a_{21}x_A + a_{22}x_B)$ . That is to say that the emergent payoff is equivalent to the sum of the corresponding  $m-1$  pairwise game and therefore there is no synergy. However, when the set breaking probabilities are non-uniform, intrinsic multiple player games emerge. In this case the “whole” is different from the sum of its parts.

## 2.2 Evolutionary dynamics of strategies

In large well mixed populations, the evolutionary dynamics of strategies based on the imitation rule can be approximated by the Langevin equation (3)

$$\begin{aligned} \dot{x}_A = & x_A(1-x_A)(g(\beta(f_A-f_B)) - g(\beta(f_B-f_A))) \\ & + \sqrt{\frac{x_A(1-x_A)(g(\beta(f_A-f_B)) + g(\beta(f_B-f_A)))}{N}} \xi. \end{aligned} \quad [9]$$

Here  $\xi$  is the white Gaussian noise,  $f_A$  (Eq. 6) and  $f_B$  (Eq. 7) are the average accumulated payoffs for strategy  $A$  and  $B$ , respectively. In addition,  $g$  is the imitation function capturing the likelihood of the focal individual to adopt the strategy of the opponent's and  $\beta$  is the selection intensity (4). Throughout,  $g'$  is positive, implying that individuals are likely to adopt the strategy of individuals with high payoffs. In particular, the Fermi update rule is an imitation update rule with the imitation function  $g(x) = [1 + \exp(-x)]^{-1}$ .

118 For large population size  $N$ , the stochastic term vanishes and we obtain

$$\dot{x}_A = x_A(1 - x_A) \left( g \left[ \frac{1}{N} \frac{lm\beta}{N} (\tilde{f}_A - \tilde{f}_B) \right] - g \left[ \frac{1}{N} \frac{lm\beta}{N} (\tilde{f}_B - \tilde{f}_A) \right] \right). \quad [10]$$

119 Note that  $\frac{1}{N} \frac{lm\beta}{N}$  is always positive and  $g' > 0$ , the equilibria of this equation are the same as that  
 120 of the following replicator equation of the multiplayer game Eq. (8) in position and stability

$$\dot{x}_A = x_A(1 - x_A)(\tilde{f}_A - \tilde{f}_B). \quad [11]$$

121 Therefore, the evolution of a pairwise game on the evolving set structured population is cap-  
 122 tured by an  $m$ -player game in a well mixed population. Under uniform breaking probabilities,  
 123 the replicator equation Eq. (11) is consistent with the one of the pairwise game in well-mixed  
 124 population. At most one internal equilibrium can arise in this case. Under non-uniform breaking  
 125 probabilities, however, Eq. (11) can exhibit up  $m - 1$  internal equilibria.

126 For any set size  $m$ , the internal roots of the replicator equation are determined by the roots of  
 127 the following Bernstein polynomial (5)

$$\tilde{f}_A - \tilde{f}_B = \sum_{s=0}^{m-1} \underbrace{\left( \frac{a_s}{k_{s+1}} - \frac{b_s}{k_s} \right)}_{\Delta d_s} \binom{m-1}{s} x^s (1-x)^{m-1-s} = 0, \quad [12]$$

128 where  $x \in (0, 1)$ . By the variation diminishing property (6) we know that the number of the internal  
 129 roots is equal to the number of sign changes of  $(\Delta d_0, \Delta d_1, \dots, \Delta d_{m-1})$ , or less by an even number.  
 130 In particular, when there is only one sign change in the sequence  $(\Delta d_0, \Delta d_1, \dots, \Delta d_{m-1})$ , there  
 131 is exactly one internal equilibrium.

132 When the set size  $m$  is 3, there can be, at most, two internal equilibria (Fig. 1). A necessary  
 133 condition for the existence of two equilibria is either  $\Delta d_0 > 0$   $\Delta d_1 < 0$  and  $\Delta d_2 > 0$ , or  $\Delta d_0 < 0$   
 134  $\Delta d_1 > 0$  and  $\Delta d_2 < 0$ . In both cases, the sign of the coefficient changes twice. The variation  
 135 diminishing property tells us that there can be either two or no internal equilibria. Since  $\Delta d_0 > 0$   
 136  $\Delta d_1 < 0$  and  $\Delta d_2 > 0$  is equivalent to  $\Delta d_0 < 0$   $\Delta d_1 > 0$  and  $\Delta d_2 < 0$  by exchanging the name  
 137 of the two strategies. We focus on  $\Delta d_0 < 0$   $\Delta d_1 > 0$  and  $\Delta d_2 < 0$ . In this case, the Bernstein  
 138 polynomial Eq. (12) is negative at  $x = 0$  and 1. Thus, the existence of two internal equilibria  
 139 is equivalent to that the maximum of the Bernstein polynomial in  $(0, 1)$  has to be positive. In the  
 140 present case, the Bernstein polynomial is quadratic with a maximum at  $x^* = (\Delta d_1 - \Delta d_2) / ((\Delta d_1 -$

141  $\Delta d_2) + (\Delta d_1 - \Delta d_0)) \in (0, 1)$ . Therefore, the Bernstein polynomial is positive at  $x^*$  if

$$-2\Delta d_0\Delta d_1\Delta d_2 + 2(\Delta d_1)^3 - \Delta d_0(\Delta d_1)^2 - \Delta d_2(\Delta d_1)^2 + \Delta d_0(\Delta d_2)^2 + \Delta d_2(\Delta d_0)^2 > 0 \quad [13]$$

142 To sum up, there are two internal equilibria if and only if either of the two conditions holds

$$\Delta d_0 < 0$$

$$\Delta d_1 > 0$$

$$\Delta d_2 < 0$$

$$-2\Delta d_0\Delta d_1\Delta d_2 + 2(\Delta d_1)^3 - \Delta d_0(\Delta d_1)^2 - \Delta d_2(\Delta d_1)^2 + \Delta d_0(\Delta d_2)^2 + \Delta d_2(\Delta d_0)^2 > 0$$

143 or

$$\Delta d_0 > 0$$

$$\Delta d_1 < 0$$

$$\Delta d_2 > 0$$

$$-2\Delta d_0\Delta d_1\Delta d_2 + 2(\Delta d_1)^3 - \Delta d_0(\Delta d_1)^2 - \Delta d_2(\Delta d_1)^2 + \Delta d_0(\Delta d_2)^2 + \Delta d_2(\Delta d_0)^2 < 0$$

### 144 **3 Games with $n$ strategies**

145 In the above section we assumed that each individual plays a pairwise game with its opponent.

146 In addition, every individual can choose only between 2 strategies. In this section, we allow

147 individuals to choose any number of strategies and thus generalise our analysis to  $n$  strategies.

148 In this case, the pairwise interaction becomes an  $n \times n$  game. We show that the previous results

149 also hold for  $n$  strategies when the set dynamics are fast enough as, (i) the accumulated payoff for

150 any strategy is an  $m$ -player game and (ii) the evolutionary dynamics of strategies can be captured

151 by the replicator equation of the  $n$ -strategy  $m$ -player game.

#### 152 **3.1 Accumulated payoffs**

153 Similar to the 2-strategy case, the breaking probability of a set depends exclusively on its strategy

154 composition. Let us denote  $k_{(\alpha_1, \alpha_2, \dots, \alpha_n)}$  as the breaking probability of a set where  $\alpha_s$  is the

155 number of strategy- $s$  individuals in the focal set and  $\alpha_s \geq 0$  and  $\sum_{s=1}^n \alpha_s = m$  indicates that the  
 156 set consists exactly of  $m$  individuals.

157 We start by randomly choosing one of the  $l$  sets, namely  $i$ . Then we define a sequence of  
 158 sets  $T_i^t$  ( $t \geq 0$ ). Here the set  $T_i^t$  evolves into  $T_i^{t+1}$ . The type of the set  $T_i^t$  — i.e.,  $\psi(T_i^t)$  — is a  
 159 Markov chain whose states are given by the possible set configurations. These set configurations  
 160 can be denoted as the simplex

$$S_{n,m} = \{(\alpha_1, \alpha_2, \dots, \alpha_n) | \alpha_s \geq 0 \text{ and } \sum_{s=1}^n \alpha_s = m\}, \quad [14]$$

161 where  $\alpha_s$  is the number of strategy  $s$  individuals in the corresponding set. The transition matrix of  
 162 this Markov chain is given by

$$Q = \frac{1}{l}V + \frac{l-1}{l}I, \quad [15]$$

163 where  $I$  is the identity matrix of size  $|S_{n,m}|$ . Here  $|S_{n,m}|$  is the cardinal number of set  $S_{n,m}$ .  $V$   
 164 is the transition matrix conditioned on the fact that the set  $i$  is selected. By the updating rule of  
 165 the sets, two subsequent sets  $T_i^t$  and  $T_i^{t+1}$  have at least  $m-1$  individuals in common. Thus the  
 166 transition is impossible between two states  $(\alpha_1, \alpha_2, \dots, \alpha_n)$  and  $(\alpha'_1, \alpha'_2, \dots, \alpha'_n)$ , unless either of  
 167 the following two cases holds.

- 168 • There exist two different strategies  $s_1$  and  $s_2$  such that  $\alpha'_{s_2} = \alpha_{s_2} + 1$  and  $\alpha'_{s_1} = \alpha_{s_1} - 1$ ; for  
 169 all the other strategies  $s$ ,  $\alpha'_s = \alpha_s$ .
- 170 • For all  $1 \leq s \leq n$ ,  $\alpha'_s = \alpha_s$ .

171 In the first case, the selected set is broken; one individual playing strategy  $s_1$  is expelled and  
 172 one individual with strategy  $s_2$  is incorporated to the set. In order to illustrate this case, we take  
 173 the transition from  $(\alpha_1, \alpha_2, \dots, \alpha_n)$  to  $(\alpha_1 + 1, \alpha_2, \dots, \alpha_n - 1)$  as an example. First, a set consisting  
 174 of  $\alpha_s$  strategy  $s$  individuals is selected, and then breaks with probability  $k_{(\alpha_1, \alpha_2, \dots, \alpha_n)}$ . Second, a  
 175 strategy  $n$  individual is expelled (with probability  $\alpha_n/m$ ). Finally, a strategy 1 individual is incor-  
 176 porated (with probability  $x_A$ , i.e., the fraction of strategy 1 in the population). Thus the transition  
 177 probability is  $\alpha_n x_A k_{(\alpha_1, \alpha_2, \dots, \alpha_n)}/m$ . Similarly, the transition probability from state  $(\alpha_1, \alpha_2, \dots, \alpha_n)$

178 to  $(\alpha'_1, \alpha'_2, \dots, \alpha'_n)$ , where the two states fulfill the first constraint, is given by

$$\frac{\alpha_{s_1}}{m} x_{s_2} k_{(\alpha_1, \alpha_2, \dots, \alpha_n)}. \quad [16]$$

179 The second case reveals that the two subsequent states are equivalent. Either the selected  
180 set is not broken or it is broken but the expelled individual and the new individual are the same in  
181 type. In this case, the transition probability can be obtained by the normalisation property of  $V$  —  
182 i.e., one minus the sum of all the other transition probabilities in Eq. (16).

183 When all the strategies coexist, i.e.,  $\prod_{i=1}^n x_i \neq 0$ , the transition matrix  $Q$  is aperiodic and  
184 irreducible, consequently the Markov chain presents a unique stationary distribution. By Eq. (15),  
185 the stationary distribution of  $Q$  is the same as that of  $V$ . This holds for any number of total links  
186  $l$ . However, the size of the state space  $|S_{n,m}|$  is  $\binom{n+m-1}{m}$  (7). As a consequence, the number  
187 of states increases much more rapidly with the set size when there are more than two types of  
188 strategies in the population (Fig (2)). Given this, it becomes challenging to calculate the stationary  
189 distribution for multiple strategies. Still, as shown in (8), for general  $n \times n$  games and the dynamical  
190 network  $m = 2$ , we have i) that the stationary distribution is a binomial distribution weighted by the  
191 duration time, ii) that the conditional transition matrix  $V$  satisfies the detailed balance condition.  
192 This binomial distribution arises from the network structure, which is a special case,  $m = 2$ , of our  
193 set structure. It turns out that these results can be generalised for  $m \geq 2$ .

- 194 • The stationary distribution of  $V$ ,  $y$ , is a multinomial distribution weighted by the duration  
195 time, i.e.,

$$y_{(\alpha_1, \alpha_2, \dots, \alpha_n)} = \frac{1}{\mathcal{N}} \frac{m!}{\alpha_1! \alpha_2! \dots \alpha_n!} \frac{1}{k_{(\alpha_1, \alpha_2, \dots, \alpha_n)}} \prod_{i=1}^n x_i^{\alpha_i}, \quad (\alpha_1, \alpha_2, \dots, \alpha_n) \in S_{n,m} \quad [17]$$

196 where  $\mathcal{N} = \sum_{(\alpha_1, \alpha_2, \dots, \alpha_n) \in S_{n,m}} \frac{m!}{\alpha_1! \alpha_2! \dots \alpha_n!} \frac{1}{k_{(\alpha_1, \alpha_2, \dots, \alpha_n)}} \prod_{i=1}^n x_i^{\alpha_i}$  is a normalisation factor.

- 197 • The Markov chain  $V$  fulfills the detailed balance condition, i.e.,

$$y_{(\alpha_1, \alpha_2, \dots, \alpha_n)} V_{((\alpha_1, \alpha_2, \dots, \alpha_n), (\alpha'_1, \alpha'_2, \dots, \alpha'_n))} = y_{(\alpha'_1, \alpha'_2, \dots, \alpha'_n)} V_{((\alpha'_1, \alpha'_2, \dots, \alpha'_n), (\alpha_1, \alpha_2, \dots, \alpha_n))}. \quad [18]$$

198 We prove that the distribution Eq. (17) satisfies the detailed balance condition.

199 If the transition from state  $(\alpha_1, \alpha_2, \dots, \alpha_n)$  to state  $(\alpha'_1, \alpha'_2, \dots, \alpha'_n)$  is impossible, then the  
200 reverse transition is also impossible. Thus, Eq. (18) holds. In the other cases, the transition is

possible. Therefore, the two states  $(\alpha_1, \alpha_2, \dots, \alpha_n)$  and  $(\alpha'_1, \alpha'_2, \dots, \alpha'_n)$  must satisfy one of the two constraints of the transition matrix.

If they fulfill the first constraint, i.e., there exist two different strategies  $s_1$  and  $s_2$  such that  $\alpha'_{s_2} = \alpha_{s_2} + 1$  and  $\alpha'_{s_1} = \alpha_{s_1} - 1$ ; for all the other strategies  $s$ ,  $\alpha'_s = \alpha_s$ . By Eqs. (16) and (17) we have that

$$\begin{aligned}
 y_{(\alpha_1, \alpha_2, \dots, \alpha_n)} V_{((\alpha_1, \alpha_2, \dots, \alpha_n), (\alpha'_1, \alpha'_2, \dots, \alpha'_n))} &= \frac{1}{\mathcal{N}} \frac{m!}{\alpha_1! \alpha_2! \dots \alpha_n!} \frac{1}{k_{(\alpha_1, \alpha_2, \dots, \alpha_n)}} \prod_{i=1}^n x_i^{\alpha_i} \times \frac{\alpha_{s_1} x_{s_2} k_{(\alpha_1, \alpha_2, \dots, \alpha_n)}}{m} \\
 &= \frac{1}{\mathcal{N}} \frac{(m-1)!}{\alpha_1! \dots (\alpha_{s_1}-1)! \dots \alpha_{s_2}! \dots \alpha_n!} \prod_{i \notin \{s_1, s_2\}} x_i^{\alpha_i} \times x_{s_1}^{\alpha_{s_1}} x_{s_2}^{\alpha_{s_2}+1} \\
 &= \frac{1}{\mathcal{N}} \frac{(m-1)!}{\alpha'_1! \dots \alpha'_{s_1}! \dots (\alpha'_{s_2}-1)! \dots \alpha'_n!} \prod_{i \notin \{s_1, s_2\}} x_i^{\alpha'_i} \times x_{s_1}^{\alpha'_{s_1}+1} x_{s_2}^{\alpha'_{s_2}} \\
 &= \frac{1}{\mathcal{N}} \frac{m!}{\alpha'_1! \alpha'_2! \dots \alpha'_n!} \frac{1}{k_{(\alpha'_1, \alpha'_2, \dots, \alpha'_n)}} \prod_{i=1}^n x_i^{\alpha'_i} \times \frac{\alpha'_{s_2} x_{s_1} k_{(\alpha'_1, \alpha'_2, \dots, \alpha'_n)}}{m} \\
 &= y_{(\alpha'_1, \alpha'_2, \dots, \alpha'_n)} V_{((\alpha'_1, \alpha'_2, \dots, \alpha'_n), (\alpha_1, \alpha_2, \dots, \alpha_n))}. \quad [19]
 \end{aligned}$$

If they fulfill the second constraint, i.e., the two states are the same, then Eq. (18) holds naturally. Therefore the stationary distribution of  $Q$  is the multinomial distribution weighted by the duration time. Furthermore,  $Q$  fulfills the detailed balance condition.

When set dynamics are fast, the average payoff is determined by the stationary distribution of each set configuration. For any strategy  $1 \leq i \leq n$ , we have

$$\begin{aligned}
 f_i &= \frac{\text{Total payoff of strategy } i}{\text{Total number of strategy } i} \\
 &= \frac{\sum_{\alpha \in S_{n,m}} (ly_{\alpha}) \left[ \alpha_i \left( \sum_{j=1}^n a_{ij} (\alpha_j - \delta_{ij}) \right) \right]}{N x_i}, \quad (20)
 \end{aligned}$$

where  $\delta_{ij}$  is the Kronecker-delta and  $N$  is the population size.

Taking Eq. (17) into Eq. (20) leads to

$$f_i = \frac{1}{\mathcal{N}} \frac{l}{N} \sum_{(\alpha_1, \alpha_2, \dots, \alpha_n) \in S_{n,m}} \frac{m!}{\alpha_1! \alpha_2! \dots \alpha_n!} \frac{1}{k_{(\alpha_1, \alpha_2, \dots, \alpha_n)}} x_i^{\alpha_i-1} \prod_{k \neq i} x_k^{\alpha_k} \left[ \alpha_i \left( \sum_{j=1}^n a_{ij} (\alpha_j - \delta_{ij}) \right) \right] [21]$$

Considering that  $\frac{m!}{\alpha_1! \dots \alpha_i! \dots \alpha_n!} \alpha_i = m \frac{(m-1)!}{\alpha_1! \dots (\alpha_i-1)! \dots \alpha_n!}$  yields that

$$f_i = \frac{1}{\mathcal{N}} \frac{lm}{N} \sum_{(\alpha_1, \alpha_2, \dots, \alpha_n) \in S_{n,m}} \frac{(m-1)!}{\alpha_1! \dots (\alpha_i-1)! \dots \alpha_n!} x_i^{\alpha_i-1} \prod_{k \neq i} x_k^{\alpha_k} \frac{1}{k_{(\alpha_1, \alpha_2, \dots, \alpha_n)}} \times \left( \sum_{j=1}^n a_{ij} (\alpha_j - \delta_{ij}) \right) [22]$$

Let  $\tilde{\alpha}_k = \alpha_k - \delta_{ik}$ ,  $(\tilde{\alpha}_1, \tilde{\alpha}_2, \dots, \tilde{\alpha}_n)$  be the co-player configuration of a strategy  $i$  individual in a set



213  $(\alpha_1, \alpha_2, \dots, \alpha_n)$ . Eq. (22) is given by

$$f_i = \frac{1}{N} \frac{lm}{N} \sum_{(\tilde{\alpha}_1, \tilde{\alpha}_2, \dots, \tilde{\alpha}_n) \in S_{n,m-1}} \underbrace{\frac{(m-1)!}{\tilde{\alpha}_1! \dots \tilde{\alpha}_i! \dots \tilde{\alpha}_n!} \prod_{k=1}^n x_k^{\tilde{\alpha}_k}}_{\text{multinomial sampling}} \underbrace{\frac{1}{k_{(\tilde{\alpha}_1, \dots, \tilde{\alpha}_i+1, \dots, \tilde{\alpha}_n)}}}_{\text{duration time} \times \text{collective payoff in the set}} \times \left( \sum_{j=1}^n a_{ij} \tilde{\alpha}_j \right) [23]$$

214 This accumulated payoff is formally equivalent to an  $n$ -strategy  $m$ -player game up to a rescaling  
 215 factor  $\frac{1}{N} \frac{lm}{N}$ . The first term is a multinomial distribution which indicates that  $m-1$  co-players are  
 216 sampled randomly as if in a well-mixed population. The second term shows that the payoff of  
 217 strategy  $i$  of the multi-player game is the collective payoff of strategy  $i$  in a set times the average  
 218 duration time of the corresponding set. This term is dependent on (i) the pairwise interaction  
 219 between strategy  $i$  and (ii) the set duration time. This explicitly generates an  $n$ -strategy  $m$ -player  
 220 game from a pairwise  $n \times n$  game  $(a_{ij})$ .

### 221 3.2 Evolutionary dynamics of strategies

222 During the imitation process, the role model and the focal individual are both chosen randomly  
 223 through the entire population. The evolution of strategies can also be approximated by the  
 224 Langevin Equation. More precisely, in this case when the population is large enough, the de-  
 225 mographic noise induced by the finite population size can be neglected (9). This results in the  
 226 following replicator equation:

$$\dot{x}_i = x_i(f_i - \bar{f}), \quad [24]$$

227 where  $f_i$  is given by Eq. (23) and  $\bar{f} = \sum_i^n x_i f_i$  is the average payoff. Consequently, the replicator  
 228 equation is consistent with an  $n$ -strategy  $m$ -player game and can exhibit up to  $(n-1)^{m-1}$  internal  
 229 isolated equilibria (2).

## 230 References

- 231 [1] Blume, A. Communication, risk, and efficiency in games. *Games and Economic Behavior* **22**,  
 232 171–202 (1998).

- 233 [2] Gokhale, C. S. and Traulsen, A. Evolutionary games in the multiverse. *Proceedings of the*  
234 *National Academy of Sciences USA* **107**, 5500–5504 (2010).
- 235 [3] Traulsen, A., Pacheco, J. M., and Imhof, L. A. Stochasticity and evolutionary stability. *Physical*  
236 *Review E* **74**, 021905 (2006).
- 237 [4] Wu, B., Altrock, P. M., Wang, L., and Traulsen, A. Universality of weak selection. *Physical*  
238 *Review E* **82**, 046106 (2010).
- 239 [5] Farouki, R. T. The bernstein polynomial basis: A centennial retrospective. *Computer Aided*  
240 *Geometric Design* **29**, 379–419 (2012).
- 241 [6] Peña, J., Lehmann, L., and Nöldeke, G. Gains from switching and evolutionary stability in  
242 multi-player matrix games. *Journal of Theoretical Biology* **346**, 23–33 (2014).
- 243 [7] Reingold, E. M., Nievergelt, J., and Deo, N. *Combinatorial algorithms: theory and practice*.  
244 Englewood Cliffs, N.J. : Prentice-Hall, cop., (1977).
- 245 [8] Wu, B., Zhou, D., and Wang, L. Evolutionary dynamics on stochastic evolving networks for  
246 multiple-strategy games. *Physical Review E* **84**(046111) (2011).
- 247 [9] Traulsen, A., Claussen, J. C., and Hauert, C. Coevolutionary dynamics: From finite to infinite  
248 populations. *Physical Review Letters* **95**, 238701 (2005).

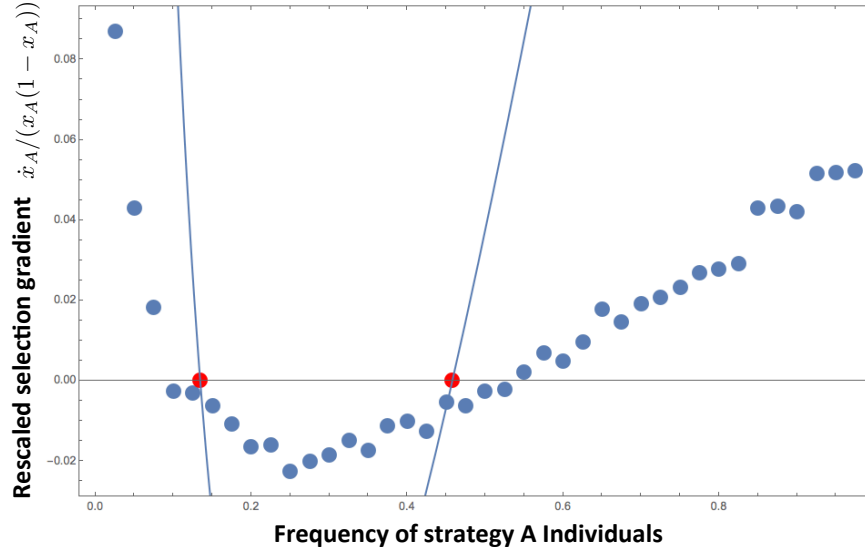

Figure 1: Rescaled selection gradient  $\dot{x}_1/(x_A(1-x_A))$ . The simulation based on the Fermi update rule (dots) shows that it has two roots. The analytical approximation (Eq.(10)) captures the equilibria of the selection gradient by simulation  $x_A^* \approx 0.13$  and  $0.46$  (red dots). The absolute value of the selection gradient, however, is systematically overestimated by the theoretical approximation for the positive selection gradient. This is because there is a heterogeneity in payoffs within the population using the same strategy. Let us assume that  $Q(f_A^*, f_B^*)$  is the probability that a strategy  $A$  individual is of payoff  $f_A^*$  and a strategy  $B$  individual is of payoff  $f_B^*$ . Then the selection gradient based on simulation is an estimator of  $\sum_{f_A^*, f_B^*} \tanh(\frac{\beta}{2}(f_A^* - f_B^*))Q(f_A^*, f_B^*)$ . Since  $\tanh(x)$  is convex for  $x > 0$ , thus the theoretical approximation  $\tanh(\frac{\beta}{2}(f_A - f_B)) = \tanh(\sum_{f_1^*, f_2^*} \frac{\beta}{2}(f_1^* - f_2^*)Q(f_1^*, f_2^*))$  is greater than the estimator of the simulation  $\sum_{f_A^*, f_B^*} \tanh(\frac{\beta}{2}(f_A^* - f_B^*))Q(f_A^*, f_B^*)$ . By similar arguments, we obtain that the theoretical approximation underestimates the simulation result for negative selection gradient. Each blue dot in the plot is the average of 100 independent realisations. Every realisation takes  $10^7$  generation. For the first  $10^4$  generations of each realisation, only set dynamics occur. After that, with a probability of  $w = 10^{-3}$  two individuals are chosen randomly from the entire population. We keep track of the transition without implementing them. We denote  $y$  and  $z$  as the number of times that an individual playing strategy  $A$  and  $B$  changes its strategy.  $\frac{z-y}{Q}$  is the estimator of the selection gradient  $\dot{x}_A$ , where  $Q$  is the number of strategy updating events in this realisation. (Parameters: Stag-Hunt game with  $a_{AA} = 2$ ,  $a_{AB} = 1$ ,  $a_{BA} = 1.5$  and  $a_{BB} = 7$ . Population size,  $N = 500$ , number of sets,  $l = 1000$ , probability of a strategy update,  $w = 10^{-3}$ . Selection intensity,  $\beta = 0.1$ . The breaking probabilities are  $k_i = (1 + 10i)^{-1}$ , where  $i$  is the number of strategy  $A$  individuals in the set.)

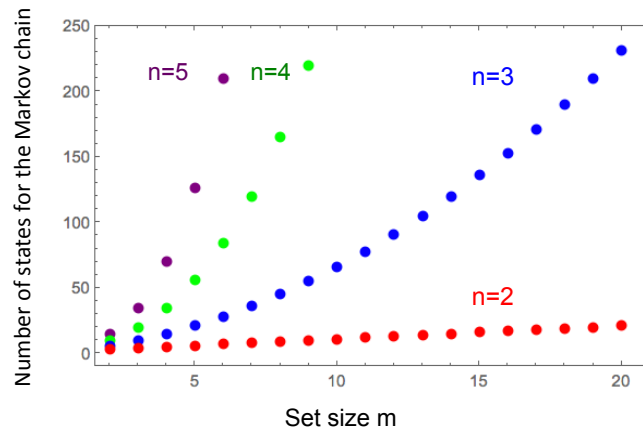

Figure 2: The size of the state space of the Markov chain of the set dynamics as a function of the set size  $m$ . For a two-strategy game, there are  $m + 1$  set configurations. For a three-strategy game, there are  $\binom{m+2}{2} = \frac{(m+2)(m+1)}{2}$  set configurations. In general, the number of the states increases rapidly with the size of the set, if the strategy number increases.
